# Supplementary material for: WITHDRAWN: Fabrication of sustainable graphene composite for heterocyclization of anti-inflammatory and antibacterial derivatives
Source: Research Square preprint supplement (doi:10.21203/rs.3.rs-5762291/v1), 2025-01-09
Supplement: Supplementary file 1 [file 079c742a1491feac83654336.docx]

**Supplementary information**

**Fabrication of sustainable graphene composite for heterocyclization of anti-inflammatory and antibacterial derivatives**

**K. S. Patil • S. T. Mane***

Department of Chemistry, Bharati Vidyapeeth’s Dr. Patangrao Kadam Mahavidyalaya, Sangli, Maharashtra, India – 416416.

E-mail: [kajalpatiljuly06@gmail.com](mailto:kajalpatiljuly06@gmail.com); [stm2011.mane@gmail.com*](mailto:stm2011.mane@gmail.com*)


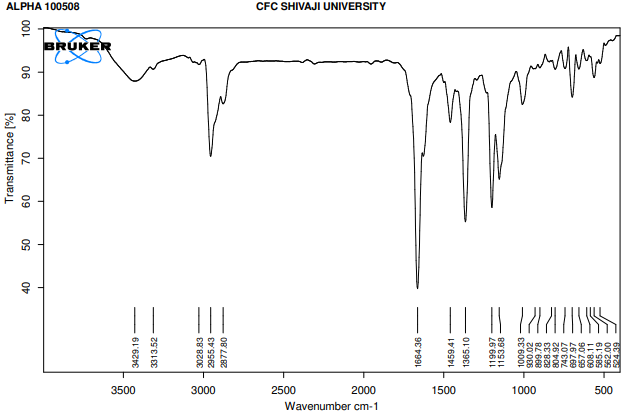


**Fig. 1.** FTIR of 9-aryl-1,8-dioxo-octahydroxanthene derivative (R: –H)


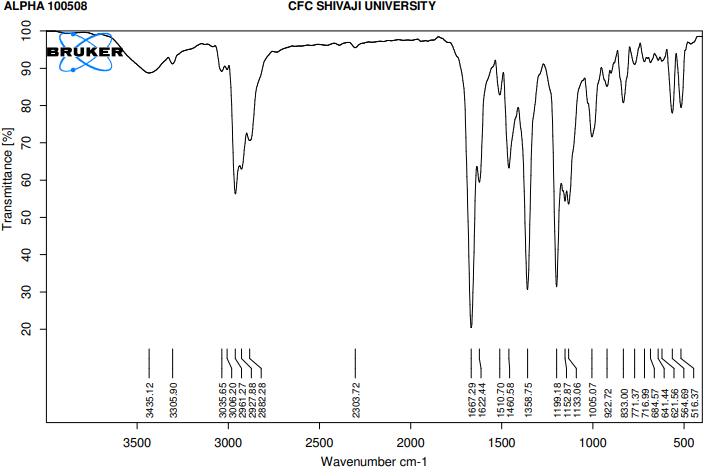


**Fig. 2.** FTIR of 9-aryl-1,8-dioxo-octahydroxanthene derivative (R: –CH3)


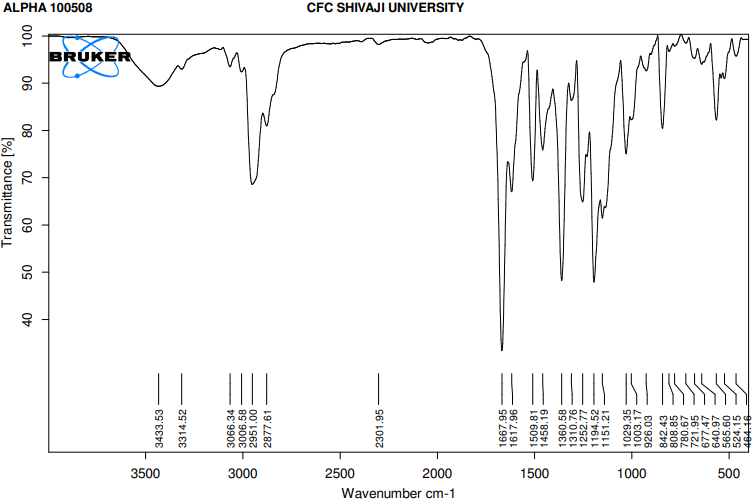


**Fig. 3.** FTIR of 9-aryl-1,8-dioxo-octahydroxanthene derivative (R: –OCH3)


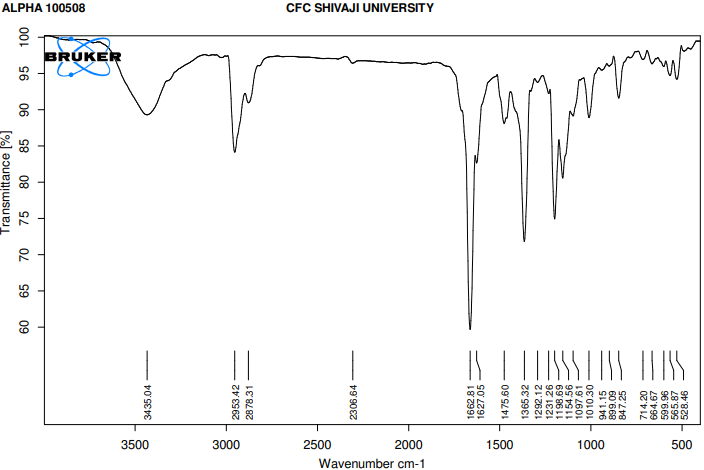


**Fig. 4.** FTIR of 9-aryl-1,8-dioxo-octahydroxanthene derivative (R: –Cl)


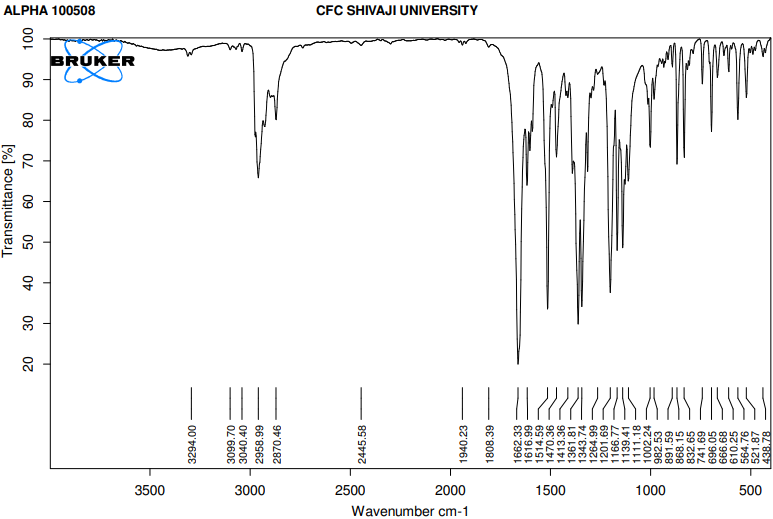


**Fig. 5.** FTIR of 9-aryl-1,8-dioxo-octahydroxanthene derivative (R: –NO2)


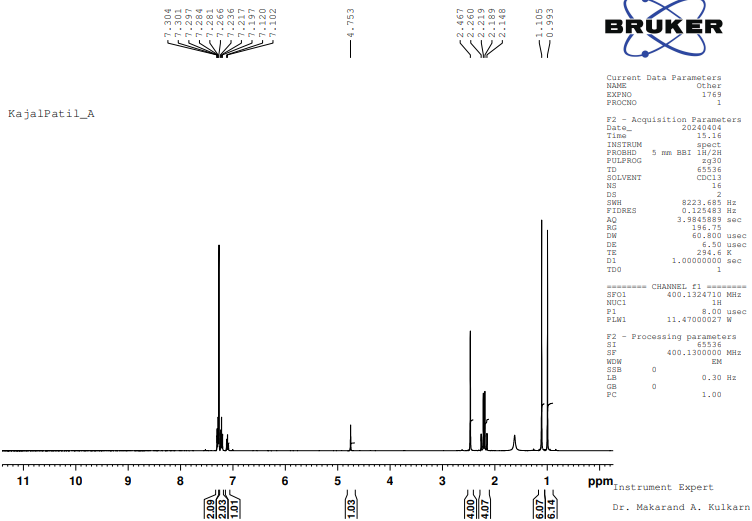


**Fig. 6.** NMR of 9-aryl-1,8-dioxo-octahydroxanthene derivative (R: –H)


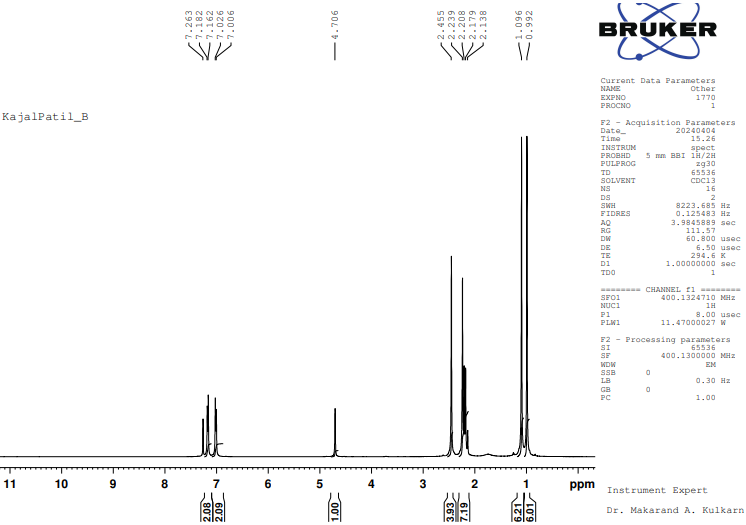


**Fig. 7.** 1H NMR of 9-aryl-1,8-dioxo-octahydroxanthene derivative (R: –CH3)


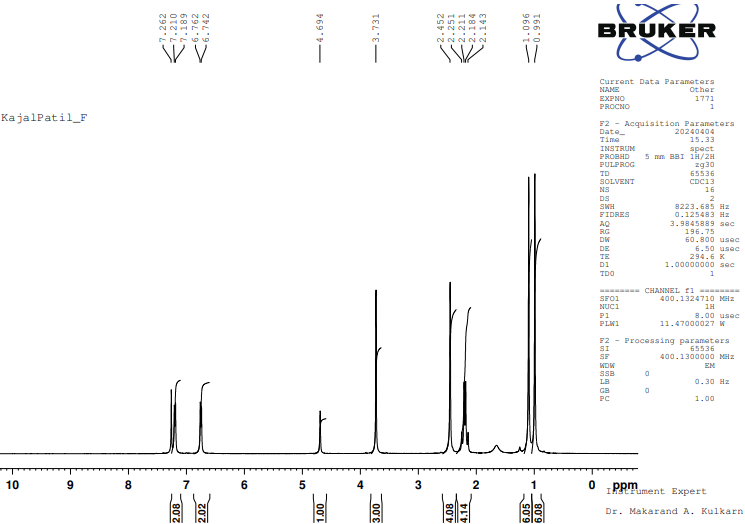


**Fig. 8.** 1H NMR of 9-aryl-1,8-dioxo-octahydroxanthene derivative (R: –OCH3)


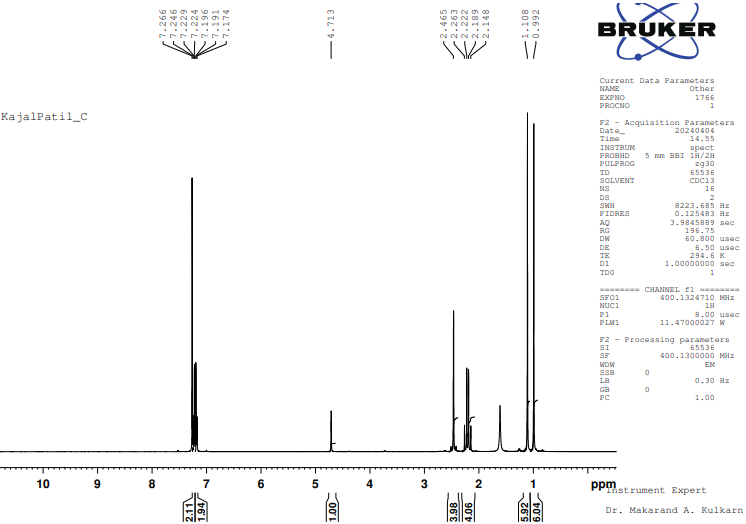


**Fig. 9.** 1H NMR of 9-aryl-1,8-dioxo-octahydroxanthene derivative (R: –Cl)


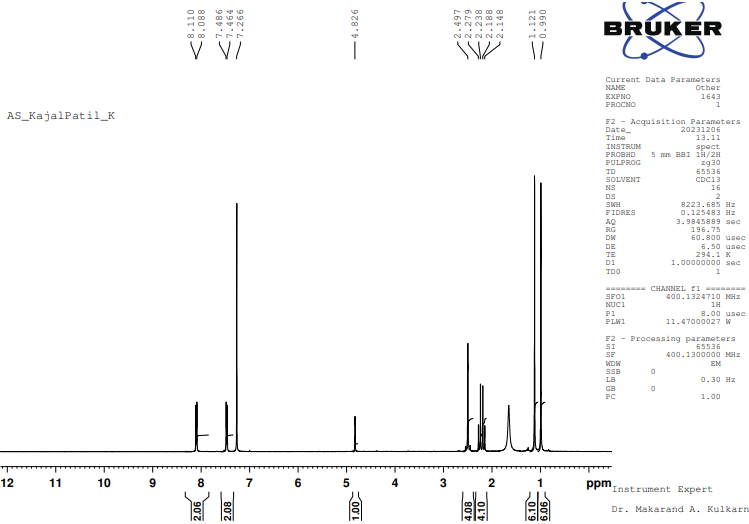


**Fig. 10.** 1H NMR of 9-aryl-1,8-dioxo-octahydroxanthene derivative (R: –NO2)

**
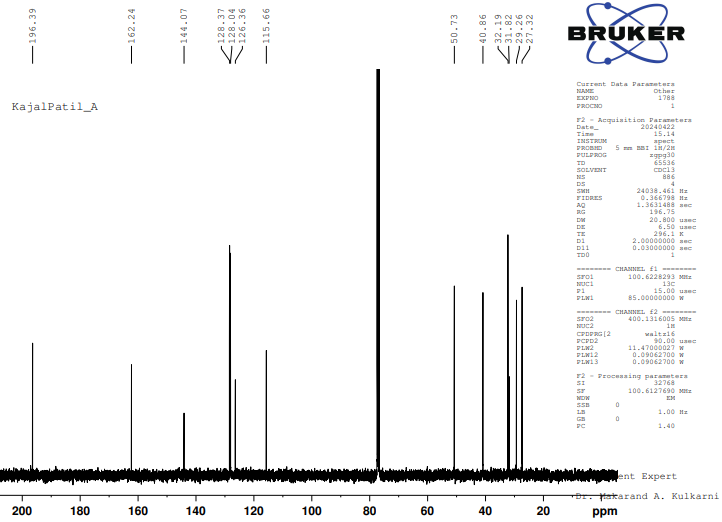
**

**Fig. 11.** 13C NMR of 9-aryl-1,8-dioxo-octahydroxanthene derivative (R: –H)


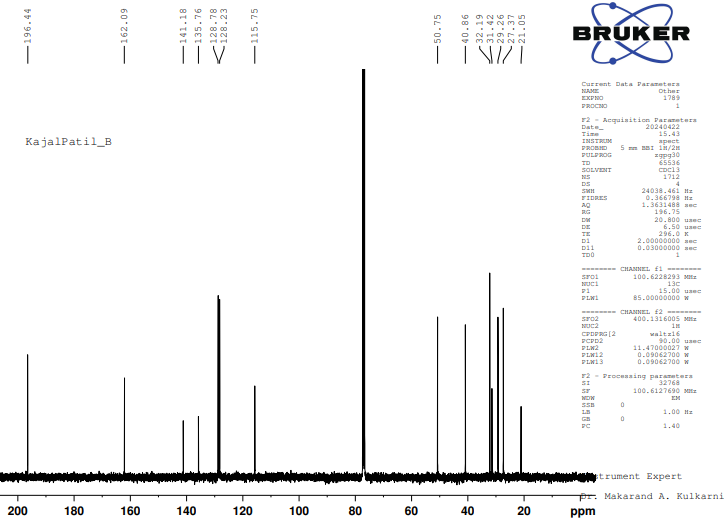


**Fig. 12.** 13C NMR of 9-aryl-1,8-dioxo-octahydroxanthene derivative (R: –CH3)


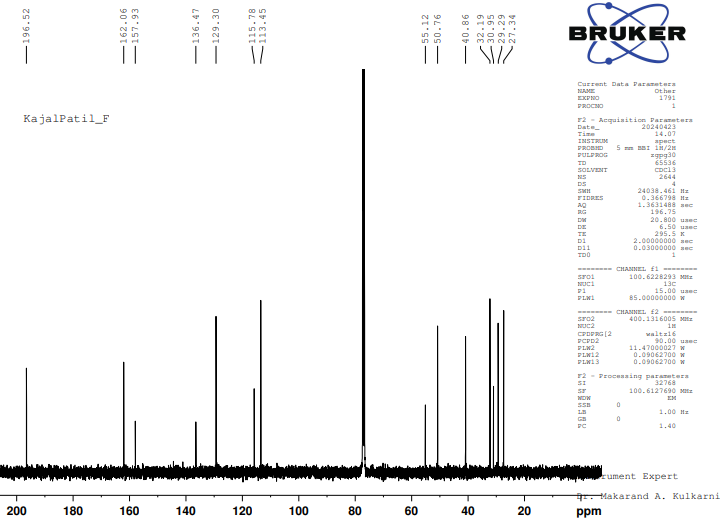


**Fig. 13.** 13C NMR of 9-aryl-1,8-dioxo-octahydroxanthene derivative (R: –OCH3)


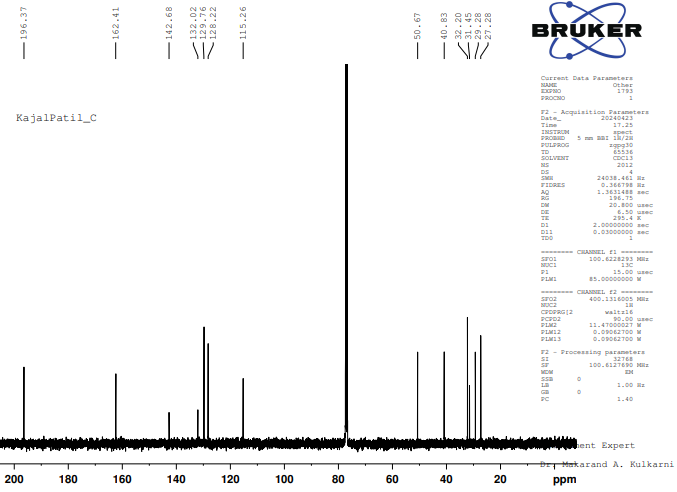


**Fig. 14.** 13C NMR of 9-aryl-1,8-dioxo-octahydroxanthene derivative (R: –Cl)


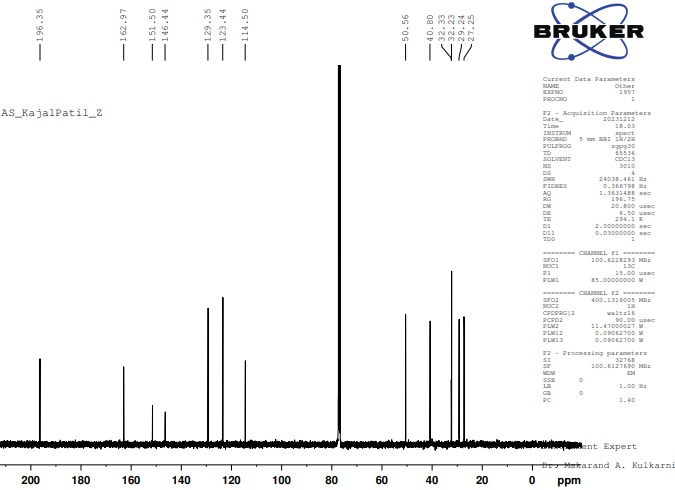


**Fig. 15.** 13C NMR of 9-aryl-1,8-dioxo-octahydroxanthene derivative (R: –NO2)
